# Supplementary material
Source: PubMed Central journal article supplement (PMC4573835)
Supplement: NIHMS700060-supplement-ESI.pdf [file NIHMS700060-supplement-ESI.pdf]

# **Synthesis of a Large Library of Macrocyclic Peptides Containing Multiple and Diverse *N*-alkylated Residues**

Jumpei Morimoto<sup>a</sup> and Thomas Kodadek<sup>a,b</sup>

<sup>a</sup>Departments of Chemistry and Cancer Biology  
The Scripps Research Institute  
130 Scripps Way, Jupiter, FL 33458

<sup>b</sup>To whom correspondence should be addressed: [Kodadek@scripps.edu](mailto:Kodadek@scripps.edu)

---

## **Contents**

|                                    |           |
|------------------------------------|-----------|
| <b>Fig. S1 .....</b>               | <b>3</b>  |
| <b>Table S1 .....</b>              | <b>4</b>  |
| <b>Materials and Methods .....</b> | <b>5</b>  |
| <b>References .....</b>            | <b>23</b> |

---

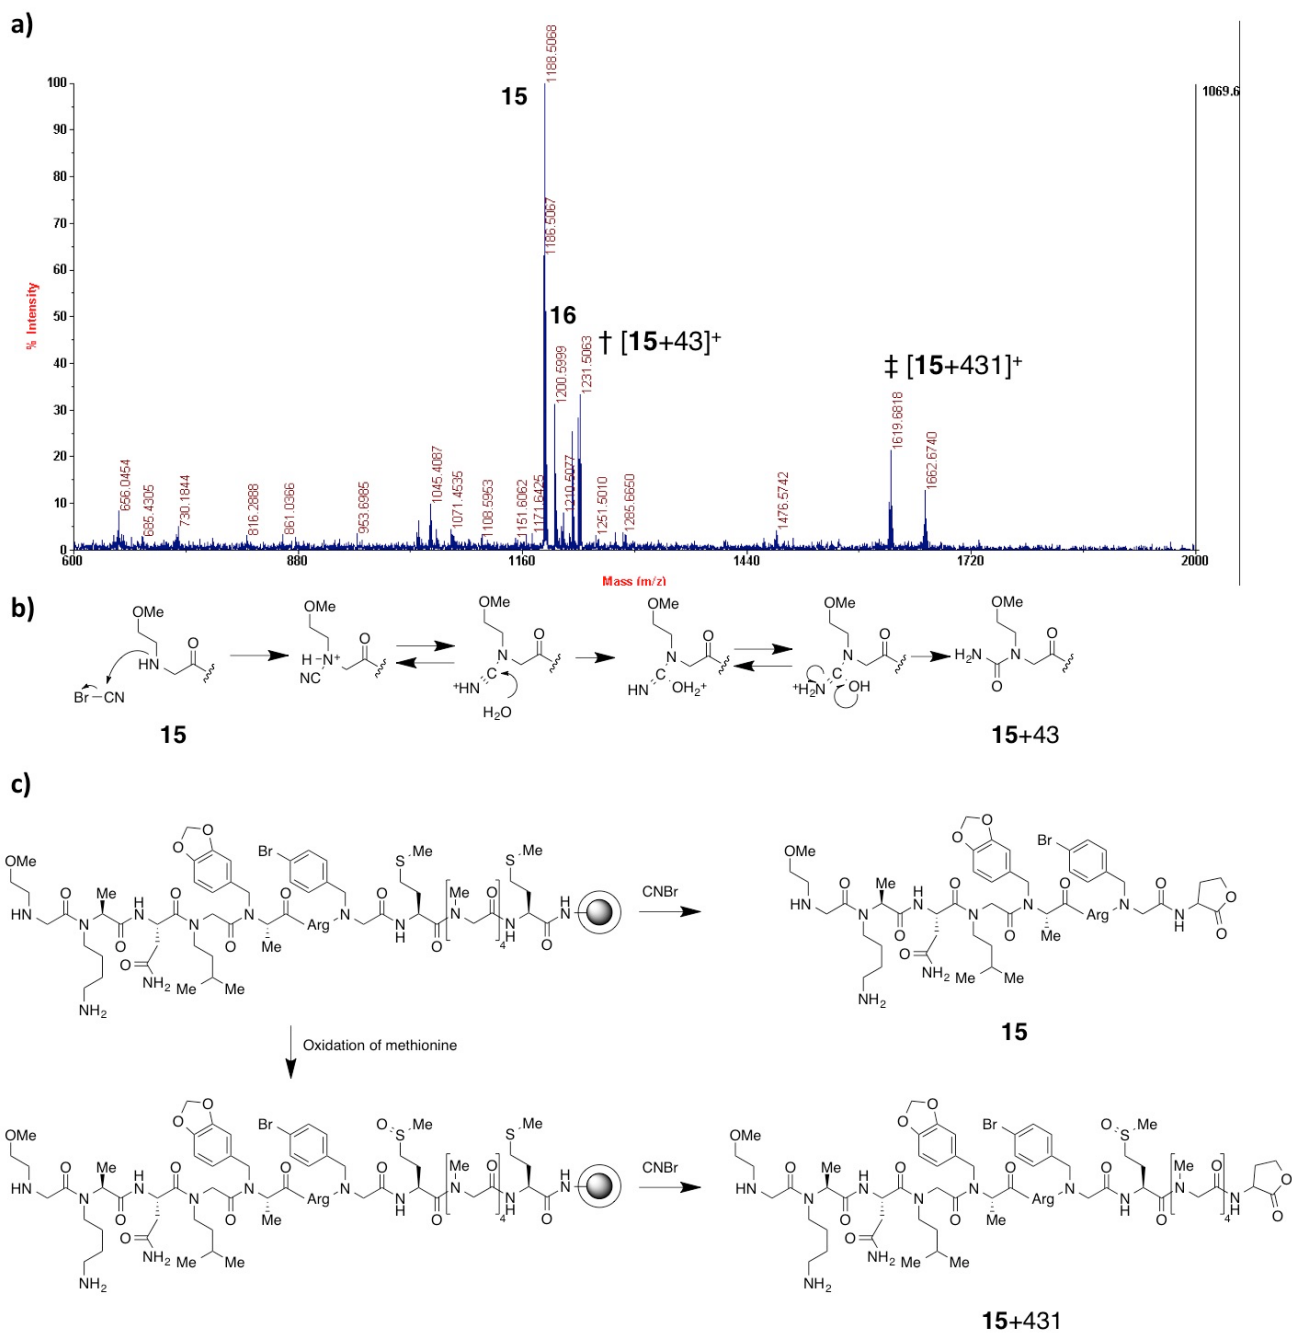

**Fig. S1** Plausible mechanisms of byproduct peaks found on a mass spectrum in Fig. 5b. a) A mass spectrum is adapted from Fig. 5b. Two major byproduct peaks corresponding to  $[15+43]^+$  and  $[15+431]^+$  are labeled with † and ‡, respectively. b) A plausible mechanism of formation of byproduct peak  $[15+43]^+$ . During CNBr cleavage, a cyano group is added to the *N*-terminal secondary amine, which lead to terminal urea formation. c) A plausible mechanism of formation of byproduct peak  $[15+431]^+$ . As linear peptide has two methionines in the linker, if *N*-terminal side of methionine is oxidized during synthesis, the other one react with CNBr, which lead to formation of the 15+431 species.

**Table S1** Sequences of oligomers cleaved from single bead in the constructed library.

| Well | Cyclic MS | Linear MS | y1 Residue 1 | y2 Residue 2 | y3 Residue 3 | y4 Residue 4 | y5 Residue 5 |
|------|-----------|-----------|--------------|--------------|--------------|--------------|--------------|
| A1   | 1263      | 1249      | 483 S-Ntbb   | 700 Nlys     | 828 D-Leu    | 941 R-Nace   | 1101 Npym    |
| A2   | 1218      | 1204      | 483 R-Nibu   | 614 Nglu     | 743 L-His    | 880 R-Nthm   | 1051 Nchm    |
| A3   | 1360      | 1346      | 483 R-Nthp   | 656 Ntmb     | 887 L-Pro    | 984 R-Npip   | 1193 Nchm    |
| A4   | 1217      | 1203      | 483 R-Nthp   | 656 Nlys     | 784 L-Ser    | 871 S-Npip   | 1076 Nipt    |
| A5   | 1333      | 1319      | 483 R-Nace   | 643 Ntmb     | 874 L-Pro    | 971 R-Ntbb   | 1192 Nipt    |
| A6   | 1272      | 1258      | 483 S-Nthp   | 652 Nfur     | 789 D-Lys    | 917 S-Nfph   | 1110 Npym    |
| A7   | 1291      | 1277      | 483 S-Nthm   | 650 Nipt     | 777 D-Tyr    | 940 S-Nthm   | 1107 Nmoe    |
| A8   | 1276      | 1262      | 483 R-Nche   | 666 Nipt     | 793 L-His    | 930 S-Npip   | 1135 Nipt    |
| A9   | 1265      | 1251      | 483 Nfph     | 676 Nchm     | 829 D-Leu    | 942 S-Nace   | 1098 Nchm    |
| A11  | 1243      | 1229      | 483 R-Nace   | 643 Ntmb     | 874 L-Pro    | 971 R-Nibu   | 1102 Nipt    |
| A12  | 1171      | 1157      | 483 S-Nace   | 639 Nlys     | 767 L-Pro    | 864 S-Nace   | 1020 Nfur    |
| B2   | 1323      | 1309      | 483 R-Nace   | 643 Nipt     | 770 D-Lys    | 898 R-Nthm   | 1069 Nebs    |
| B4   | 1296      | 1282      | 483 S-Npip   | 688 Nglu     | 817 L-Glu    | 946 R-Npip   | 1155 Nipt    |
| B5   | 1300      | 1286      | 483 S-Nthm   | 650 Nglu     | 779 D-Tyr    | 942 S-Ntbb   | 1159 Nipt    |
| B6   | 1255      | 1241      | 483 S-Nibu   | 610 Ntmb     | 841 D-Leu    | 954 R-Nace   | 1114 Nipt    |
| B7   | 1193      | 1179      | 483 R-Nace   | 643 Nchm     | 796 D-Asn    | 910 S-Nlys   | 1052 Nipt    |
| B8   | 1234      | 1220      | 483 S-Nthm   | 650 Nchm     | 803 L-Pro    | 900 S-Nfph   | 1093 Nipt    |
| B9   | 1273      | 1259      | 483 R-Nibu   | 614 Nfur     | 751 D-Tyr    | 914 R-Nfph   | 1111 Npym    |
| B10  | 1263      | 1249      | 483 S-Ntbb   | 700 Nchm     | 853 L-Pro    | 950 R-Nlys   | 1096 Nchm    |
| B11  | 1162      | 1148      | 483 S-Nthm   | 650 Nipt     | 777 D-Leu    | 890 R-Nibu   | 1021 Nipt    |
| B12  | 1246      | 1232      | 483 S-Nthp   | 652 Nfur     | 789 L-Pro    | 886 R-Npip   | 1095 Nfur    |
| C1   | 1333      | 1319      | 483 R-Nthp   | 656 Nbpm     | 879 L-Ser    | 966 S-Npip   | 1171 Npym    |
| C2   | 1256      | 1242      | 483 R-Nche   | 666 Nglu     | 795 L-Pro    | 892 R-Nfph   | 1089 Nchm    |
| C3   | 1295      | 1281      | 483 S-Nthm   | 650 Nbpm     | 873 L-Ser    | 960 R-Nthp   | 1133 Npym    |
| C4   | 1251      | 1237      | 483 R-Nthm   | 654 Nglu     | 783 L-His    | 920 S-Nthp   | 1089 Npym    |
| C5   | 1264      | 1250      | 483 R-Npip   | 692 Nfur     | 829 D-Tyr    | 992 R-Nibu   | 1123 Nipt    |
| C7   | 1165      | 1151      | 483 R-Nibu   | 614 Nipt     | 741 L-Pro    | 838 R-Nace   | 998 Nchm     |
| C8   | 1208      | 1194      | 483 S-Nibu   | 610 Nglu     | 739 L-Pro    | 836 R-Ntbb   | 1057 Nfur    |
| C9   | 1342      | 1328      | 483 S-Npip   | 688 Nfur     | 825 D-Lys    | 953 S-Npip   | 1158 Nmoe    |
| C11  | 1220      | 1206      | 483 S-Nace   | 639 Nlys     | 767 D-Leu    | 880 R-Nthp   | 1053 Nchm    |
| C12  | 1235      | 1221      | 483 R-Nche   | 666 Nlys     | 794 D-Tyr    | 957 S-Nibu   | 1084 Nfur    |
| D2   | 1253      | 1239      | 483 R-Nace   | 643 Nlys     | 771 L-Pro    | 868 R-Nibu   | 999 Nebs     |
| D3   | 1298      | 1284      | 483 S-Nthm   | 650 Nbpm     | 873 D-Asn    | 987 S-Nibu   | 1114 Nmoe    |
| D4   | 1308      | 1294      | 483 S-Nace   | 639 Nbpm     | 862 L-His    | 999 S-Nlys   | 1141 Nchm    |
| D5   | 1355      | 1341      | 483 S-Nche   | 662 Nchm     | 815 D-Leu    | 928 R-Nthp   | 1101 Nebs    |
| D6   | 1223      | 1209      | 483 S-Nibu   | 610 Nfur     | 747 D-Lys    | 875 R-Nfph   | 1072 Nfur    |
| D7   | 1168      | 1154      | 483 R-Nibu   | 614 Nfur     | 751 D-Lys    | 879 S-Nibu   | 1006 Npym    |
| D8   | 1290      | 1276      | 483 R-Nthp   | 656 Ndmp     | 877 L-Ser    | 964 S-Nlys   | 1106 Nmoe    |
| D9   | 1150      | 1136      | 483 R-Nthp   | 656 Nglu     | 785 L-Pro    | 882 S-Nibu   | 1009 Nipt    |
| D11  | 1186      | 1172      | 483 R-Nace   | 643 Nipt     | 770 L-Glu    | 899 R-Nlys   | 1045 Nipt    |
| D12  | 1205      | 1191      | 483 R-Nibu   | 614 Nipt     | 741 L-Ser    | 828 S-Nfph   | 1021 Nmoe    |

48 oligomers from the macrocyclic library were analyzed and 41 sequences were fully characterized. (85% sequensability).

4 letter codes of amines and 3 letter codes of amino acids found in **Fig. 6** are used to describe each residue. For residue 1 and 4, configuration at  $\alpha$ -carbon is shown by R or S. Note that R or S configuration in these oligomers are inverse of acid submonomers are inverted by amine displacement reaction.

Mass spectra and chemical structures of compounds in well A2 and A4 are shown in **Fig. 7**.

## Materials and methods

**General:** (*S*)-2-bromopropanoic acid- $d_4$  (S-BPA- $d_4$ ) was prepared according to the previously reported method<sup>1</sup>. All other chemicals were purchased and used without further purification.

**Synthesis of oligomers having *N*-teminal residues and extention of those oligomers with a peptoid residue (4–6):** Each oligomer was synthesized on 50 mg of Rink Amide AM resin (0.69 mmol/g, 34.5  $\mu$ mol).

### Step 1 Linker synthesis

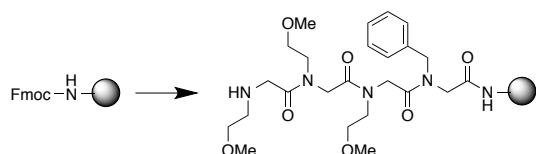

After resin was swollen in 1 mL of DMF for 15 min, Fmoc group was deprotected by treating resin with 1 mL of 20% piperidine in DMF for 3 min once and then 12 min once and resin was washed with DMF three times. Peptoid linker (Nmea-Nmea-Nmea-Nben) was synthesized following the standard submonomer synthetic method.

### Step 2 PTA syntehsis

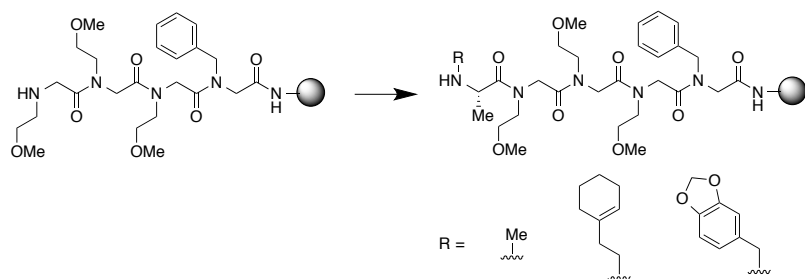

Resin was washed with DCM three times and THF three times and incubated with 120  $\mu$ L of DIPEA (690  $\mu$ mol) in 3.1 mL of THF at RT for 10 min. 30.9 mg of triphosgene (104  $\mu$ mol) and 27.9  $\mu$ L of (R)-BPA (311  $\mu$ mol) in 3.1 mL of THF was cooled at  $-20^\circ\text{C}$  for 10 min. 113  $\mu$ L of TMP (863  $\mu$ mol) was added to the cooled triphosgene and (R)-BPA solution and the mixture was immediately applied to the resin incubated with DIPEA in THF. Resin was incubated with continuous shaking at  $37^\circ\text{C}$  for 2 h and washed with THF three times and then with DMF three times. Resin was incubated with 1 M amine in DMF with continuous shaking at  $60^\circ\text{C}$  overnight and washed with DMF three times.

### Step 3 Peptoid synthesis after PTA residue

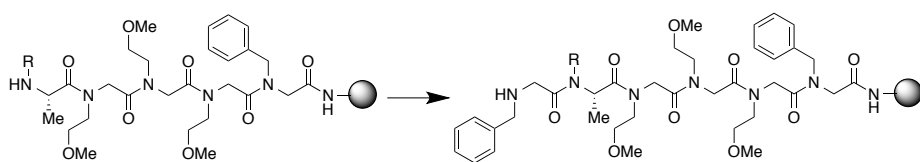

The PTA residue was chain extended with a peptoid residue using one of the following two conditions A or B.

A) Standard submonomer peptoid synthetic method: 345  $\mu\text{L}$  of 2 M BAA (690  $\mu\text{mol}$ ) in DMF and 345  $\mu\text{L}$  of 1 M DIC (345  $\mu\text{mol}$ ) in DMF were mixed and incubated at RT for 1 min and then applied to resin. Resin was incubated with continuous shaking at 37  $^{\circ}\text{C}$  for 2 h and resin was washed with DMF three times. This acylation procedures were repeated once more. Resin was incubated with 1 M amine in DMF with continuous shaking at 37  $^{\circ}\text{C}$  for 1 h and washed with DMF three times.

B) Chloroacetyl chloride method: 16.5  $\mu\text{L}$  of chloroacetyl chloride (207  $\mu\text{mol}$ ) in 2.07 mL of DCM was cooled at  $-20^{\circ}\text{C}$  for 10 min; Resin was incubated with 36.1  $\mu\text{L}$  of DIPEA (207  $\mu\text{mol}$ ) in 2.07 mL of DCM at 4  $^{\circ}\text{C}$  for 10 min. 94.1  $\mu\text{L}$  of TMP (311  $\mu\text{mol}$ ) was added to the cooled chloroacetyl chloride solution and the mixture was immediately applied to the resin. Resin was incubated with continuous shaking at 4  $^{\circ}\text{C}$  for 2 h and washed with DCM three times. These acylation procedures were repeated once more. Resin was incubated with 1 M amine in DMF at 60  $^{\circ}\text{C}$  overnight and washed with DMF three times.

#### *Step 4 Deprotection and cleavage of the synthesized oligomers from resin*

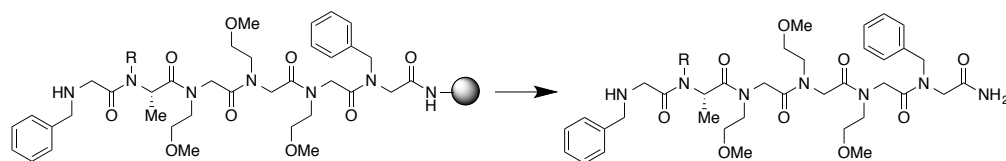

Resin was washed with DCM three times and then synthesized oligomers were deprotected and cleaved from resin by treating resin with 2 mL of TFA/TIPS/thioanisole/ $\text{H}_2\text{O}$  = 92.5/2.5/2.5/2.5 mixture with continuous shaking at RT for 3 h. Cleaved oligomer was recovered as a pellet by ether precipitation and the pellet was washed with 10 mL of ether twice. After drying the pellet under air, the oligomer was reconstituted in water:acetonitrile 5:1 solution containing 0.1 % TFA and used for HPLC analysis.

**Synthesis and analysis of peptide and peptoid hybrid oligomers (7–12).** Each oligomer was synthesized on 50 mg of Knorr Amide MBHA resin (0.69 mmol/g, 34.5  $\mu\text{mol}$ ). After resin was swollen in 1 mL of DMF for 15 min, Fmoc group was deprotected by treating resin with 1 mL of 20% piperidine in DMF for 3 min once and 12 min once and resin was washed with DMF three times. Peptide and peptoid hybrid oligomers were synthesized by repeating the following submonomer peptoid synthetic method and DIC/oxyma peptide synthetic method.

#### *Submonomer peptoid synthetic method*

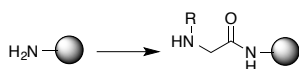

First 345  $\mu\text{L}$  of 2 M BAA (690  $\mu\text{mol}$ ) in DMF and 345  $\mu\text{L}$  of 1 M DIC (345  $\mu\text{mol}$ ) in DMF were mixed and incubated at RT for 1 min and then applied to resin. Resin was incubated with continuous shaking at 37  $^{\circ}\text{C}$  for 10 min and resin was washed with DMF three times. Resin was incubated with 1 M amine in DMF with continuous shaking at 37  $^{\circ}\text{C}$  for 1 h and washed with DMF three times.

#### *DIC/oxyma peptide synthetic method*

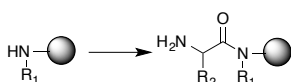

138  $\mu\text{mol}$  each of Fmoc-amino acid, Oxyma (19.6 mg), and DIC (21.5  $\mu\text{L}$ ) were preincubated in 690  $\mu\text{L}$  of DMF at RT for 10 min. The mixture was applied to resin and resin was incubated with continuous shaking at RT for 2 h and washed with DMF three times. The procedures were repeated once more.

After completion of the last amino acid coupling and Fmoc deprotection, resin was washed with DCM three times and then synthesized oligomers were deprotected and cleaved from resin by treating resin with 2 mL of TFA/TIPS/thioanisole/ $\text{H}_2\text{O}$  = 92.5/2.5/2.5/2.5 mixture with continuous shaking at RT for 3 h. Cleaved oligomer was recovered as a pellet by ether precipitation and the pellet was washed with 10 mL of ether twice. After drying the pellet under air, the oligomer was reconstituted in 5 mL of water:acetonitrile 5:1 solution containing 0.1 % TFA. 20  $\mu\text{L}$  of each oligomer solution was injected and analyzed on HPLC equipped with C18 reverse phase column.

**Synthesis of a macrocyclic oligomer containing peptide, peptoid, and PTA units:** Each oligomer was synthesized on 75 mg of 90  $\mu\text{m}$  TentaGel R RAM beads (0.20 mmol/g, 15  $\mu\text{mol}$ ). Detailed procedures for synthesis of oligomer x are described below. Oligomer y is synthesized with the same procedures using different amines and an amino acid.

#### *Step 1 Fmoc-Glu(OAll)-OH coupling*

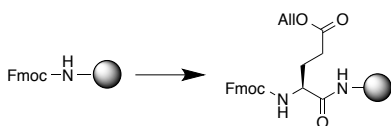

After resin was swollen in 1 mL of DMF for 15 min, Fmoc group was deprotected by treating resin with 1 mL of 20% piperidine in DMF for 3 min and then 12 min and resin was washed with DMF three times.

Fmoc-Glu(OAll)-OH was coupled using DIC/Oxyma coupling conditions at RT for 90 min.

### Step 2 PTA synthesis

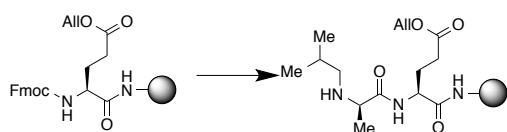

After Fmoc was deprotected, resin was washed with DMF and DCM three times each and with THF once. Resin was incubated with 52.3  $\mu\text{L}$  of DIPEA (300  $\mu\text{mol}$ ) in 1.35 mL THF at RT for 10 min. 13.4 mg of triphosgene (45  $\mu\text{mol}$ ) and 12.2  $\mu\text{L}$  of (S)-BPA (135  $\mu\text{mol}$ ) was dissolved in 1.35 mL of THF and cooled at  $-20\text{ }^{\circ}\text{C}$  for 10 min. 49.3  $\mu\text{L}$  of TMP (375  $\mu\text{mol}$ ) was added to the cooled triphosgene solution and the mixture was immediately applied to resin. Resin was incubated with continuous shaking at RT for 2 h and washed with DCM and DMF three times each. Amine displacement was performed with 1 mL of 1 M isobutylamine in DMF at  $60\text{ }^{\circ}\text{C}$  overnight.

### Step 3 Petpoid synthesis using chloroacetyl chloride

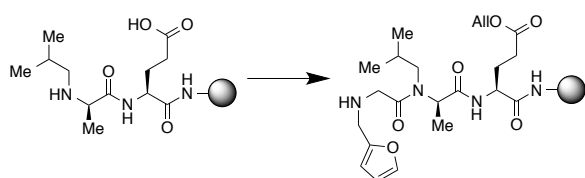

After washing with DMF and DCM three times each, resin was incubated with 13.1  $\mu\text{L}$  of DIPEA (75  $\mu\text{mol}$ ) in 750  $\mu\text{L}$  of DCM at  $4\text{ }^{\circ}\text{C}$  for 10 min. 8.48  $\mu\text{L}$  of chloroacetyl chloride (75  $\mu\text{mol}$ ) was dissolved in 750  $\mu\text{L}$  of DCM and cooled at  $-20\text{ }^{\circ}\text{C}$  for 10 min. 14.8  $\mu\text{L}$  of TMP was added to the cooled chloroacetyl chloride solution and the mixture was immediately applied to resin. Resin was incubated with continuous shaking at  $4\text{ }^{\circ}\text{C}$  for 2 h and washed with DCM three times. These acylation procedures were repeated once more. Amine displacement was performed with 1 mL of 1 M furfurylamine in DMF at  $60\text{ }^{\circ}\text{C}$  overnight and resin was washed with DMF three times.

### Step 4 Amino acid coupling

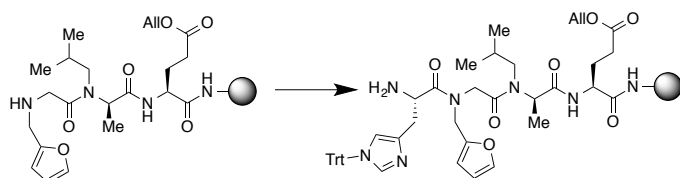

Fmoc-His(Trt)-OH (120  $\mu\text{mol}$ ), 17.0 mg of Oxyma (120  $\mu\text{mol}$ ), and 18.7  $\mu\text{L}$  of DIC (120  $\mu\text{mol}$ ) were preincubated in 600  $\mu\text{L}$  of DMF at RT for 10 min and applied to resin. Resin was incubated with continuous shaking at RT for 2 h and washed with DMF three times. These amino acid coupling procedures were repeated once more and Fmoc was deprotected.

#### Step 5 PTA synthesis

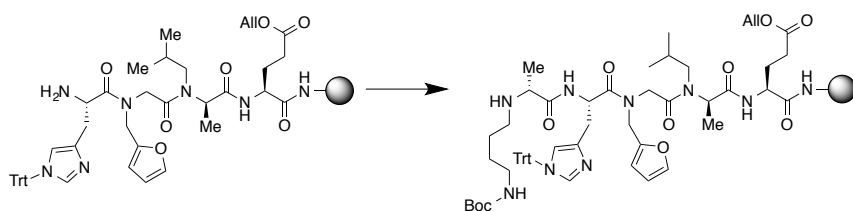

The BPA coupling and amine displacement were performed following the same procedures of step 2 using (S)-BPA and *N*-Boc-diaminobutane. BPA coupling was performed for 3 h.

#### Step 6 Petpoid synthesis using chloroacetyl chloride

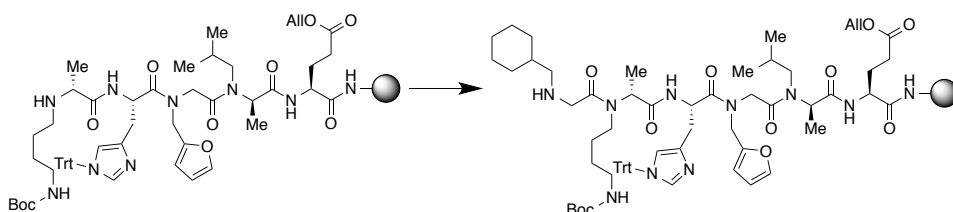

Chloroacetyl chloride reaction and amine displacement were performed following the same procedures of step 3 using cyclohexylmethylamine.

#### Step 7 Deprotection of allyl protecting group on Glu side chain

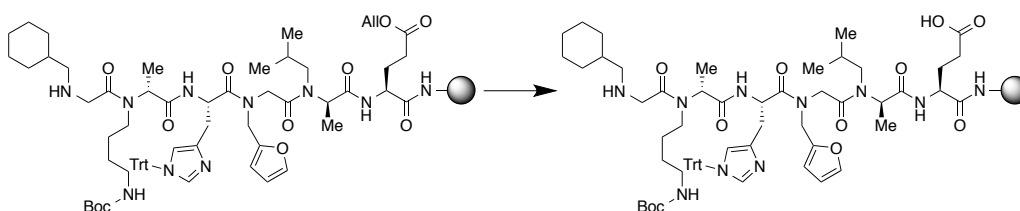

Allyl group was deprotected by incubating the resin with 52.0 mg of  $\text{Pd}(\text{PPh}_3)_4$  (45  $\mu\text{mol}$ ) and 22.1  $\mu\text{L}$  of  $\text{PhSiH}_3$  (180  $\mu\text{mol}$ ) in 1.56 mL DCM with continuous shaking at RT for 30 min. Resin was washed with DCM, DMF, 0.5% DIPEA in DMF, and 0.5% sodium diethyldithiocarbamate trihydrate in DMF three times each and then with 0.5% DIPEA in DMF and DMF once each.

#### Step 8 Macrocyclization and cleavage

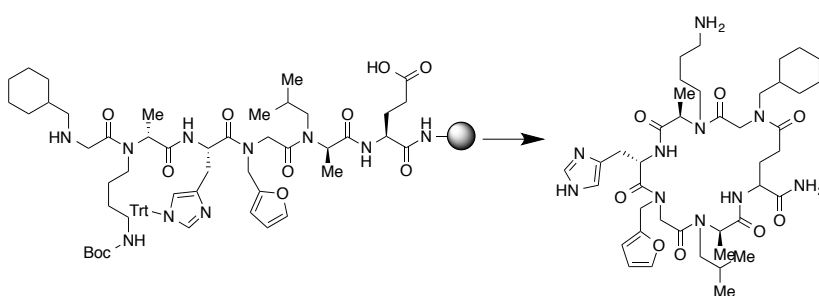

Resin was divided into two (7.5  $\mu\text{mol}$ ) each. One was cleaved without macrocyclization and the other one was macrocyclized. Macrocyclization was performed by incubating resin with 7.82 mg of PyAOP (15  $\mu\text{mol}$ ), 2.04

mg of HOAt (15  $\mu$ mol), and 5.23  $\mu$ L of DIPEA (30  $\mu$ mol) in 750  $\mu$ L of DMF with rotation at RT for 6 h. Resin was washed with DMF three times and incubated in 750  $\mu$ L of DMF with rotation at RT overnight. Resin was washed with DMF and DCM three times each and then incubated with 1 mL of 50% TFA/DCM containing 2.5% TIPS and 2.5% thioanisole with continuous shaking at RT for 2 h. Cleaved oligomer was recovered by ether precipitation. Precipitated oligomer was dissolved in 500  $\mu$ L of 10% acetonitrile/water containing 0.1% TFA and used for HPLC analysis.

**Synthesis of a macrocyclic oligomer on physically segregated bilayer TentaGel beads with linear encoding chain and analysis of the products:** 100 mg of 90  $\mu$ m TentaGel R NH<sub>2</sub> beads (0.22 mmol/g, 22  $\mu$ mol) was swollen in DMF for 15 min.

#### Step 1 Sarcosine linker synthesis

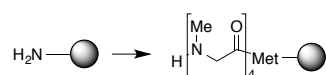

A linker of methionine and trimer sarcosine was synthesized by the standard submonomer peptoid synthetic method. For amine displacement step in the synthesis, 2 M methylamine in THF was diluted with DMF to 1 M and used.

#### Step 2 Bead segregation

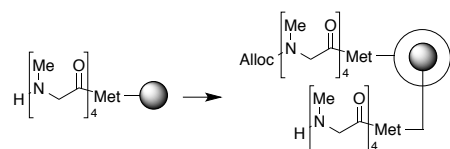

Beads were washed with water 10 times and incubated in water with continuous shaking at RT overnight. After water was drained, resin was briefly washed with 1 mL of DCM:Ether = 55:45 twice and incubated with 1.37  $\mu$ L of N-(Allyloxycarbonyloxy)succinimide (8.8  $\mu$ mol) and 3.07  $\mu$ L of DIPEA (17.6  $\mu$ mol) in 4.4 mL of DCM:Ether = 55:45 with vigorous shaking at RT for 30 min to cap amines on exterior layer of beads with alloc group. Resin was washed with DMF three times and incubated in DMF with continuous shaking at RT overnight.

#### Step 3 Interior linker synthesis

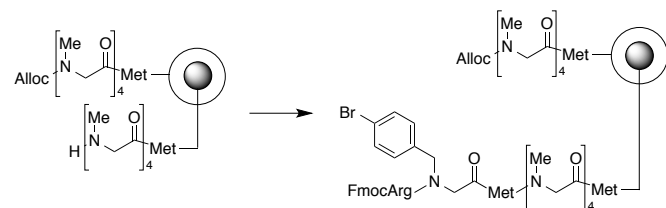

Fmoc-Met-OH was coupled using DIC/Oxyma coupling conditions with 2 h reaction time. A peptoid residue

with 4-bromobenzyl side chain was synthesized with the standard peptoid submonomer synthetic method using 4-bromobenzylamine at amine displacement step. Fmoc-Arg(Pbf)-OH was coupled using DIC/Oxyma coupling conditions described above with 2 h reaction time.

#### Step 4 Introduction of Glu(OAll) on exterior layer

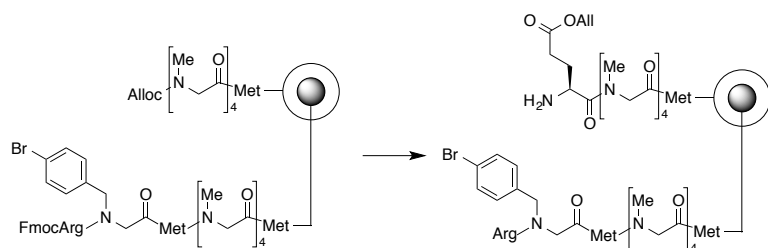

Alloc group on exterior amine was deprotected by incubating the resin with 76.3 mg of  $\text{Pd(PPh}_3)_4$  (66  $\mu\text{mol}$ ) and 32.4  $\mu\text{L}$  of  $\text{PhSiH}_3$  (264  $\mu\text{mol}$ ) in 2.3 mL DCM with continuous shaking at RT for 30 min. Resin was washed with DCM, DMF, 0.5% DIPEA in DMF, and 0.5% sodium diethyldithiocarbamate trihydrate in DMF three times each and then with 0.5% DIPEA in DMF and DMF once each. Fmoc-Glu(OAll)-OH was coupled using DIC/Oxyma at RT overnight. Fmoc group on both exterior and interior layers of the beads were deprotected by treating the resin with 20% piperidine in DMF for 3 min and 12 min once each and beads were washed with DMF three times.

#### Step 5 PTA synthesis

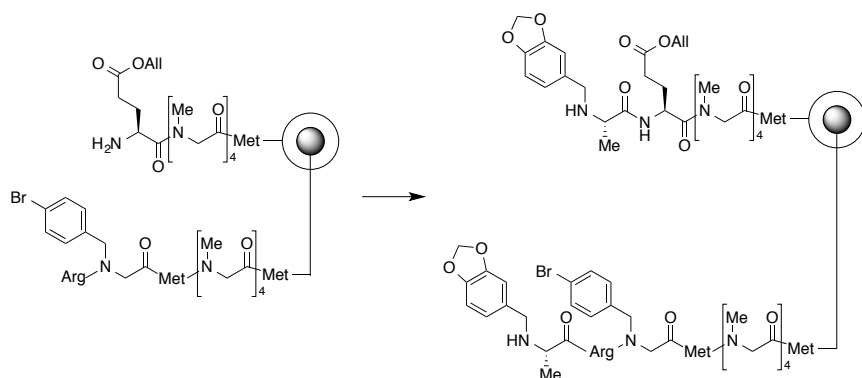

The resin was washed with DCM and THF three times each and incubated with 76.7  $\mu\text{L}$  of DIPEA (440  $\mu\text{mol}$ ) in 1 mL THF at RT for 10 min. 19.6 mg of triphosgene (66  $\mu\text{mol}$ ) and 17.8  $\mu\text{L}$  of (R)-BPA (198  $\mu\text{mol}$ ) was dissolved in 2 mL of THF and cooled at  $-20^\circ\text{C}$  for 10 min. 72.3  $\mu\text{L}$  of TMP (550  $\mu\text{mol}$ ) was added to the cooled triphosgene solution and the mixture was immediately applied to resin. Resin was incubated with continuous shaking at RT for 90 min and washed with DCM and DMF three times each. Resin was incubated with 1 mL of 1 M piperonylamine (1 mmol) in DMF at  $60^\circ\text{C}$  overnight.

#### Step 6 Peptoid synthesis using chloroacetyl chloride

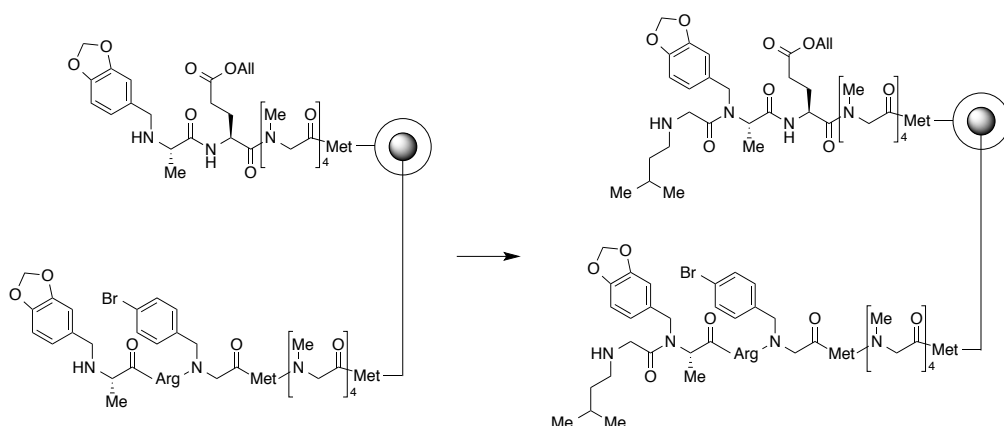

After washing with DMF and DCM three times each, resin was incubated with 23  $\mu\text{L}$  of DIPEA (132  $\mu\text{mol}$ ) in 1.32 mL of DCM at 4  $^{\circ}\text{C}$  for 10 min. 10.5  $\mu\text{L}$  of chloroacetyl chloride (132  $\mu\text{mol}$ ) was dissolved in 1.32 mL of DCM and cooled at  $-20^{\circ}\text{C}$  for 10 min. 26.0  $\mu\text{L}$  of TMP (198  $\mu\text{mol}$ ) was added to the cooled chloroacetyl chloride solution and the mixture was immediately applied to resin. Resin was incubated with continuous shaking at 4  $^{\circ}\text{C}$  for 2 h and washed with DCM three times. These acylation procedures were repeated once more and resin was washed with DMF three times. Amine displacement was performed with 1 mL of 1 M isopentylamine in DMF (1 mmol) at 60  $^{\circ}\text{C}$  overnight and resin was washed with DMF three times.

#### Step 7 Amino acid coupling

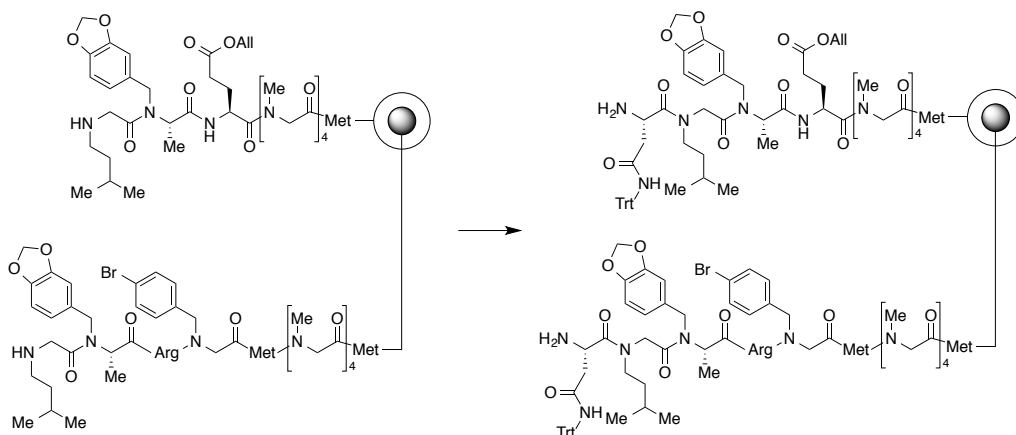

78.8 mg of Fmoc-Asn(Trt)-OH (132  $\mu\text{mol}$ ), 18.7 mg of Oxyma (132  $\mu\text{mol}$ ), and 20.5  $\mu\text{L}$  of DIC (132  $\mu\text{mol}$ ) were preincubated in 660  $\mu\text{L}$  of DMF at RT for 10 min and applied to resin. Resin was incubated with continuous shaking at RT for 2 h and washed with DMF three times. These amino acid coupling procedures were repeated once more and Fmoc was deprotected.

#### Step 8 PTA synthesis

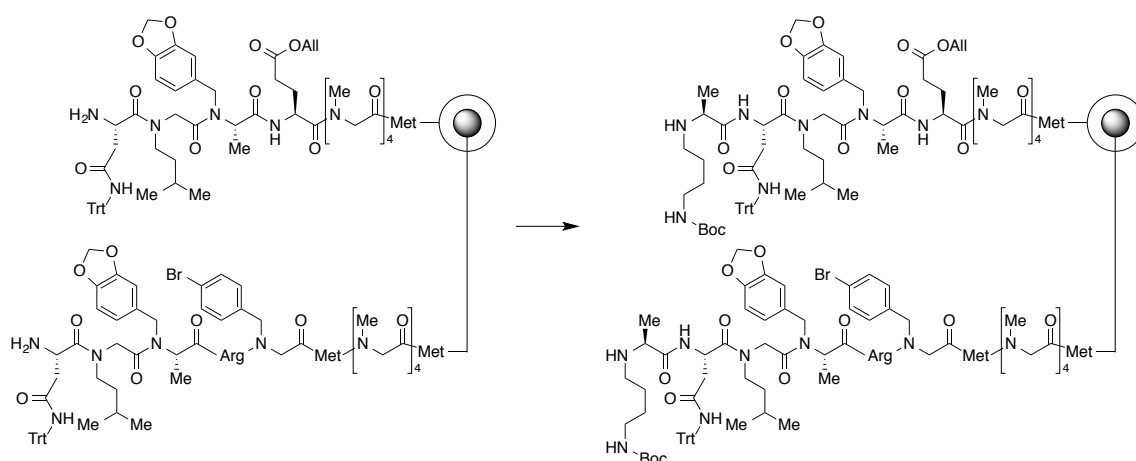

The BPA coupling and amine displacement were performed following the same procedures of step 5 using N-Boc-1,4-diaminobutane.

#### Step 9 Peptoid synthesis

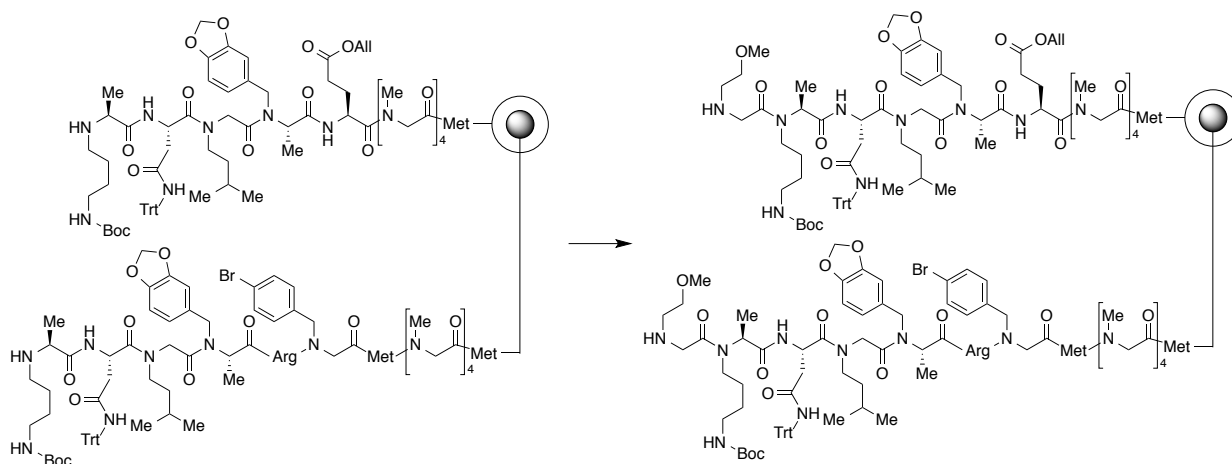

Chloroacetyl chloride reaction and amine displacement were performed following the same procedures of step 6 using 2-methoxyethylamine.

#### Step 10 Deprotection of allyl group on glutamic acid side chain

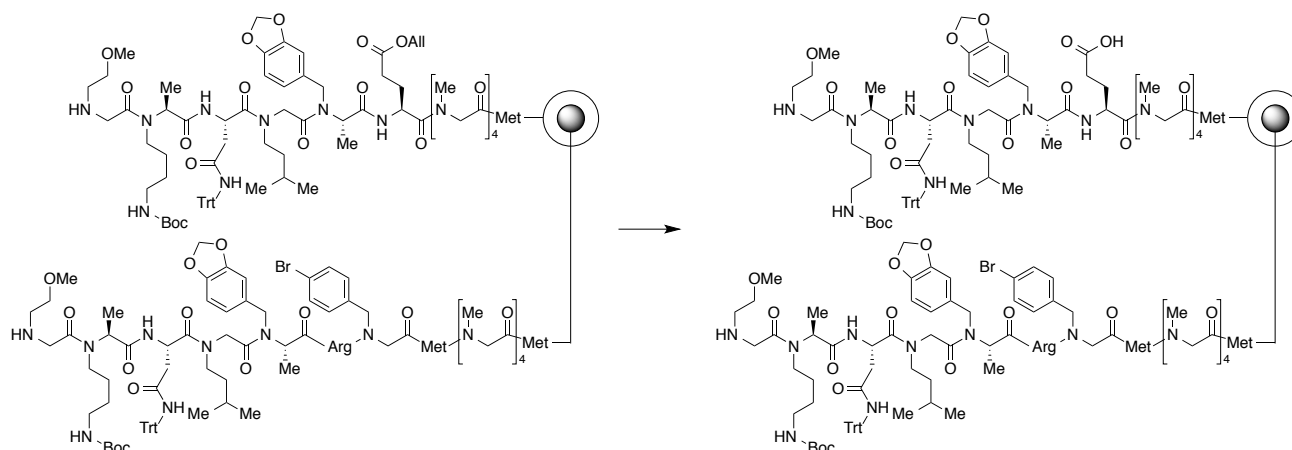

Allyl group was deprotected by incubating the resin with 76.3 mg of  $\text{Pd}(\text{PPh}_3)_4$  (66  $\mu\text{mol}$ ) and 32.4  $\mu\text{L}$  of  $\text{PhSiH}_3$  (264  $\mu\text{mol}$ ) in 2.29 mL DCM with continuous shaking at RT for 30 min. Resin was washed with DCM, DMF, 0.5% DIPEA in DMF, and 0.5% sodium diethyldithiocarbamate trihydrate in DMF three times each and then with 0.5% DIPEA in DMF and DMF once each.

#### Step 11 Macrocyclization and deprotection

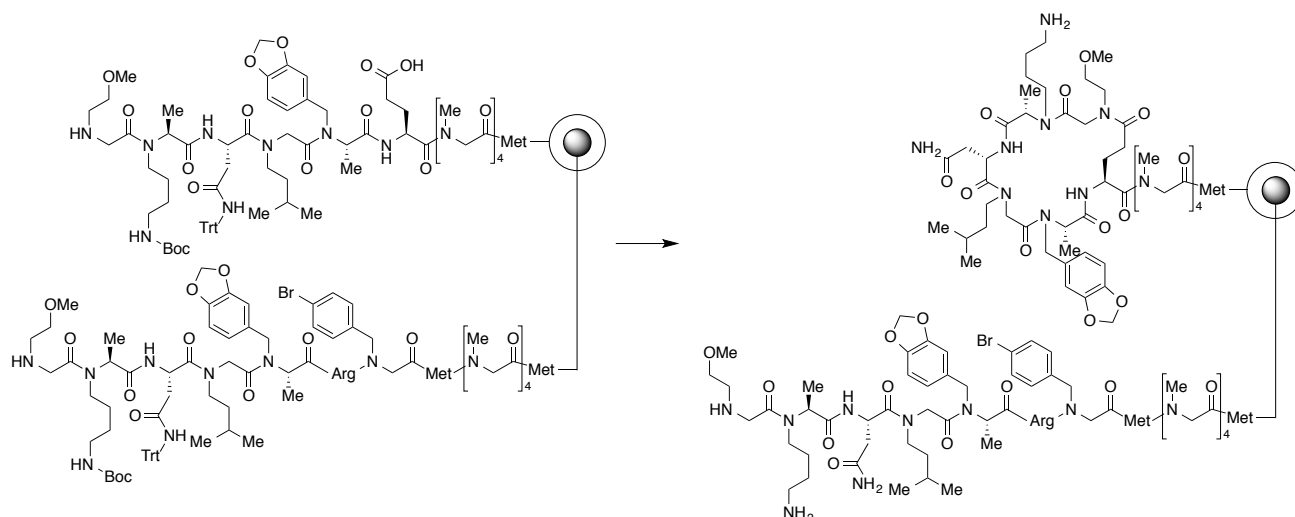

Macrocyclization was performed by incubating resin with 25.2 mg of PyAOP (48.4  $\mu\text{mol}$ ), 6.58 mg of HOAt (48.4  $\mu\text{mol}$ ), and 16.9  $\mu\text{L}$  of DIPEA (96.8  $\mu\text{mol}$ ) in 2.2 mL of DMF with rotation at RT overnight. Resin was washed with DMF and DCM three times each and then incubated with 1 mL of 50% TFA/DCM containing 2.5% TIPS and 2.5% thioanisole with continuous shaking at RT for 2 h to deprotect all the side chains. Resin was washed with DCM three times.

#### Step 12 Single bead cleavage and MALDI-TOF MS analysis of the synthesized linear and macrocyclic oligomers

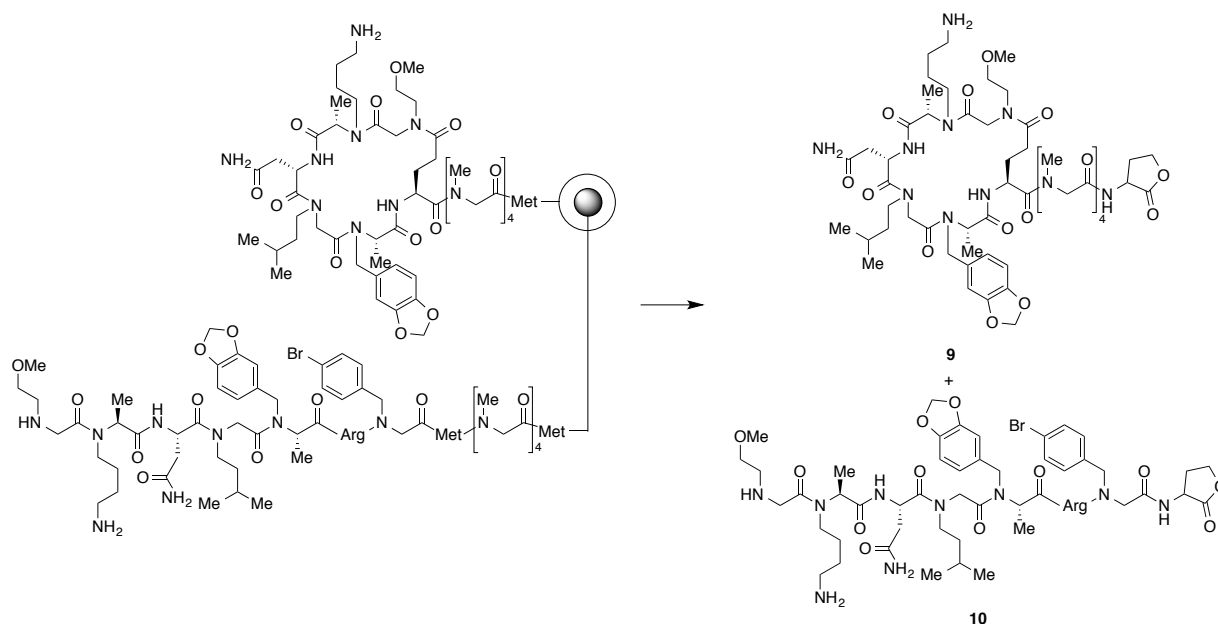

Single bead was isolated in 96-well plate and oligomers on the bead was cleaved by incubating the bead with 50  $\mu\text{L}$  of 30 mg/mL CNBr in acetonitrile/acetic acid/water = 5/4/1 with gentle shaking at RT overnight. The solution was dried under vacuum and the cleaved oligomers were dissolved in 20  $\mu\text{L}$  of 80% acetonitrile/water containing 0.1% TFA. 0.5  $\mu\text{L}$  of the solution was spotted on MALDI plate, mixed with 0.5  $\mu\text{L}$  of 5 mg/mL CHCA in 80% acetonitrile/water containing 0.1% TFA, dried, and analyzed by MALDI-TOF MS.

**Synthesis of a macrocyclic oligomer library on physically segregated bilayer TentaGel beads with linear encoding chain:** 1.2 g of 90  $\mu\text{m}$  TentaGel R  $\text{NH}_2$  beads (0.20 mmol/g, 240  $\mu\text{mol}$  total) were swollen in DMF for 15 min.

#### Step 1 Sarcosine linker synthesis

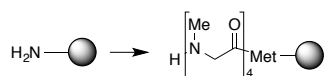

A linker of methionine and trimer sarcosine was synthesized by the standard submonomer peptoid synthetic method. For amine displacement step in the synthesis, 2 M methylamine in THF was diluted with DMF to 1 M and used.

#### Step 2 Bead segregation

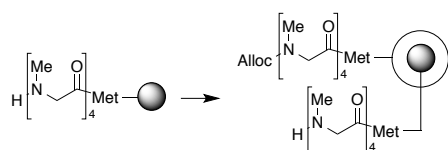

Beads were separated into 5 reaction vessels (240 mg, 48  $\mu\text{mol}$  each). Beads were washed with water 10 times

and incubated in water with continuous shaking at RT overnight. After water was drained, beads in each reaction vessel were briefly washed with 1 mL of DCM:Ether = 55:45 twice and incubated with 2.99  $\mu$ L of N-(Allyloxycarbonyloxy)succinimide (19.2  $\mu$ mol) and 6.69  $\mu$ L of DIPEA (38.4  $\mu$ mol) in 9.6 mL of DCM:Ether = 55:45 with vigorous shaking at RT for 30 min to cap amines on exterior layer of beads with alloc group. Resin was combined into one reaction vessel, washed with DMF three times, and incubated in DMF with continuous shaking at RT overnight.

### Step 3 Interior linker synthesis

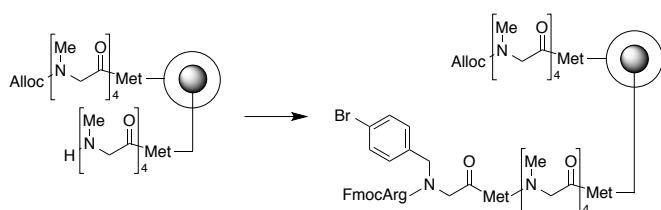

Fmoc-Met-OH was coupled using DIC/Oxyma coupling conditions with 2 h reaction time. A peptoid residue with 4-bromobenzyl side chain was synthesized with the standard peptoid submonomer synthetic method using 4-bromobenzylamine at amine displacement step. Fmoc-Arg(Pbf)-OH was coupled using DIC/Oxyma coupling conditions described above with overnight reaction.

### Step 4 Introduction of Glu(OAll) on exterior layer

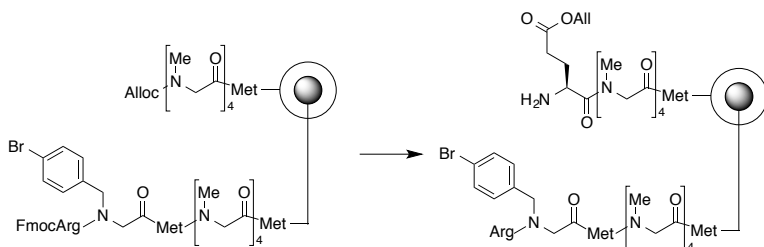

Alloc group on exterior amine was deprotected by incubating the resin with 555 mg of  $\text{Pd}(\text{PPh}_3)_4$  (480  $\mu$ mol) and 236  $\mu$ L of  $\text{PhSiH}_3$  (1.92 mmol) in 16.7 mL DCM with continuous shaking at RT for 1 h. Resin was washed with DCM, DMF, 0.5% DIPEA in DMF, and 0.5% sodium diethyldithiocarbamate trihydrate in DMF three times each and then with 0.5% DIPEA in DMF and DMF once each. Fmoc-Glu(OAll)-OH was coupled using DIC/Oxyma at RT for 4 h and Fmoc group on both exterior and interior layers of the beads were deprotected.

### Step 5 BPA coupling

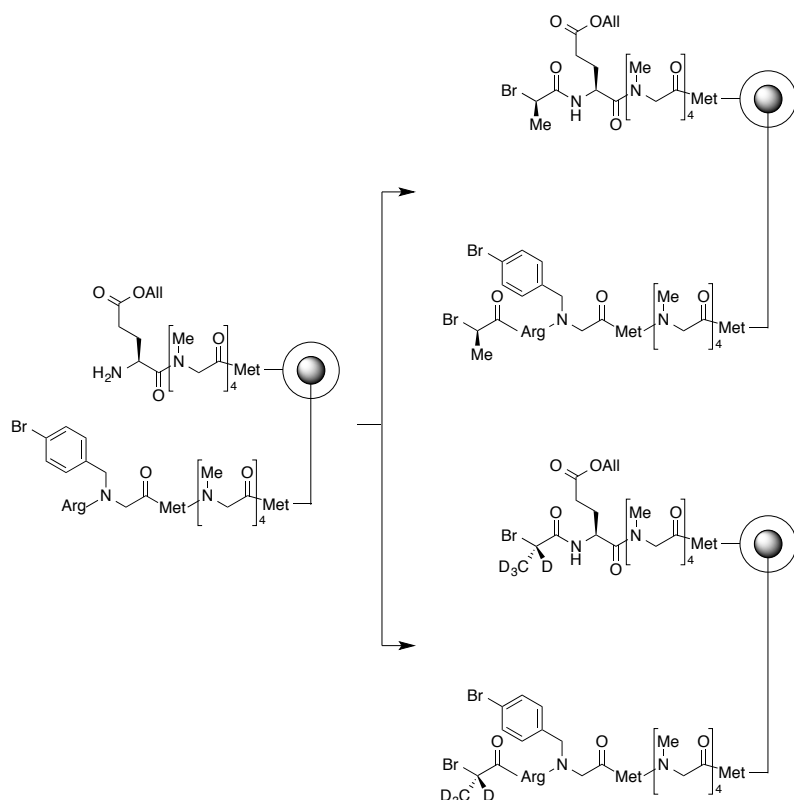

The resin was washed with DCM and THF three times each and split into 2 reaction vessels (600 mg, 120  $\mu\text{mol}$  each). Each resin was incubated with 418  $\mu\text{L}$  of DIPEA (2.40 mmol) in 5.4 mL THF at RT for 10 min. 107 mg of triphosgene (360  $\mu\text{mol}$ ) and 97.2  $\mu\text{L}$  of (R)-BPA or (S)-BPA- $\text{d}_4$  (1.08 mmol) was dissolved in 5.4 mL of THF and cooled at  $-20^\circ\text{C}$  for 10 min. 395  $\mu\text{L}$  of TMP (3.00 mmol) was added to the cooled triphosgene solution and the mixture was immediately applied to resin. Resin was incubated with continuous shaking at RT for 2 h and washed with DCM and DMF three times each. Resin was combined in one reaction vessel and mixed thoroughly.

#### Step 6 Amine displacement

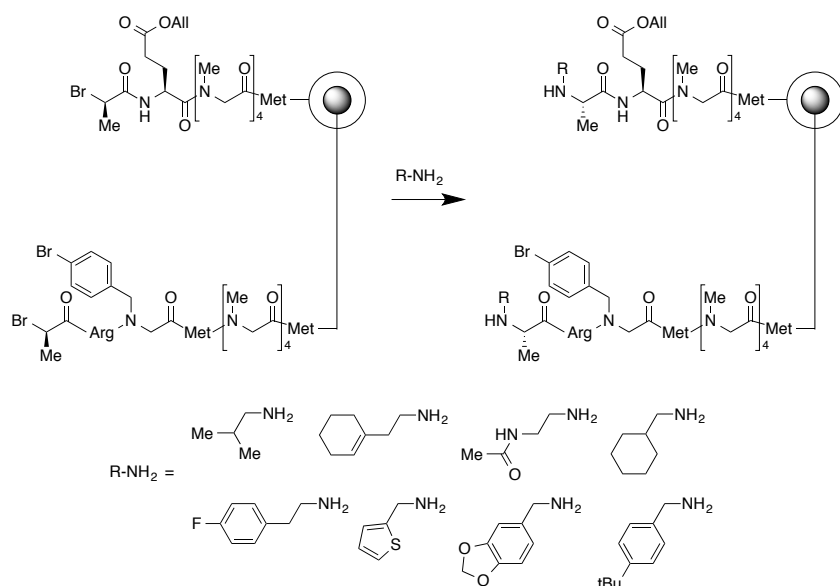

Resin was divided into 8 reaction vessels (150 mg, 30  $\mu$ mol each) and each resin was incubated with 1.2 mL of 1 M solution of one of the 8 primary amines shown above in DMF with continuous shaking at 60  $^{\circ}$ C overnight. A reaction scheme with resin obtained from (R)-BPA coupling in step 5 is shown above as an example. Note that a stereocenter of  $\alpha$ -carbon at the terminal residue is inverted during amine displacement reaction. Resin was washed with DMF three times, combined into one reaction vessel, and mixed thoroughly.

#### Step 7 Acylation by chloroacetyl chloride

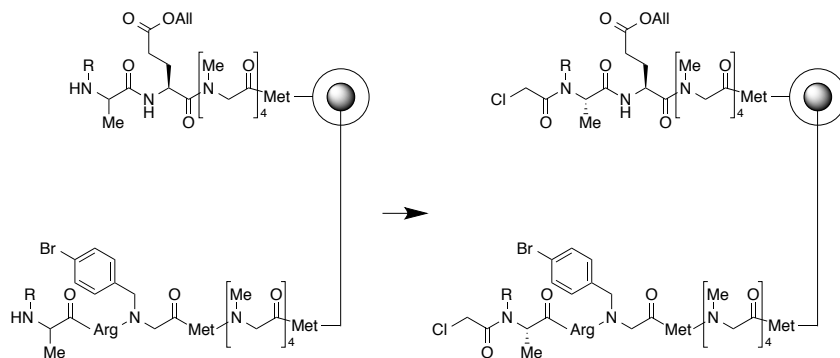

After washing with DCM three times, resin was incubated with 251  $\mu$ L of DIPEA (1.44 mmol) in 14.4 mL of DCM at 4  $^{\circ}$ C for 10 min. 114  $\mu$ L of chloroacetyl chloride (1.44 mmol) was dissolved in 14.4 mL of DCM and cooled at  $-20^{\circ}$ C for 10 min. 284  $\mu$ L of TMP (2.16 mmol) was added to the cooled chloroacetyl chloride solution and the mixture was immediately applied to resin. Resin was incubated with continuous shaking at 4  $^{\circ}$ C for 2 h and washed with DCM three times. These acylation procedures were repeated once more and resin was washed with DMF three times.

#### Step 8 Amine displacement

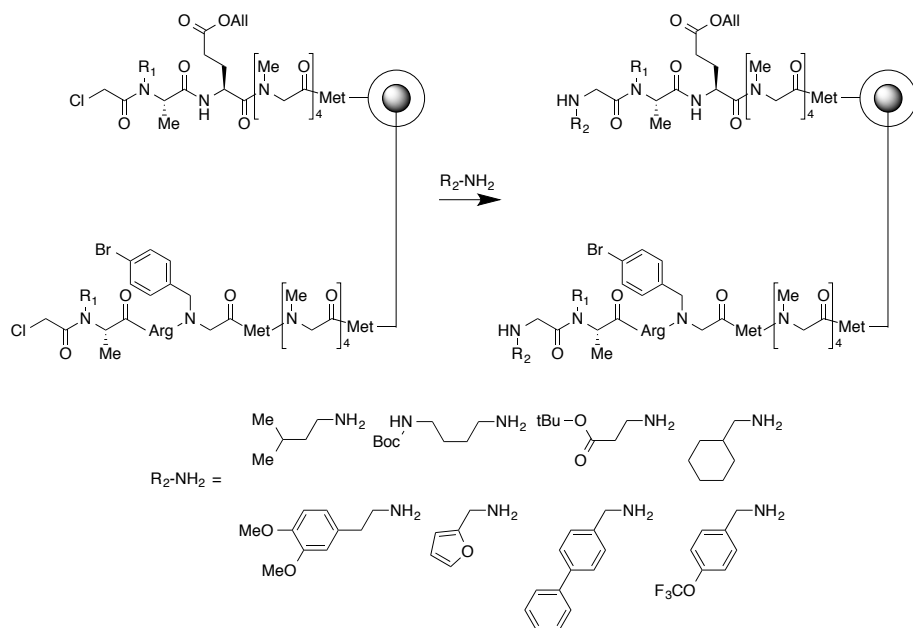

Resin was divided into 8 reaction vessels (150 mg, 30  $\mu$ mol each) and each resin was incubated with 1.2 mL of 1 M solution of one of the 8 primary amines shown above in DMF with continuous shaking at 60  $^{\circ}$ C overnight. Resin was washed with DMF three times, combined into one reaction vessel, and mixed thoroughly.

#### Step 9 Amino acid coupling

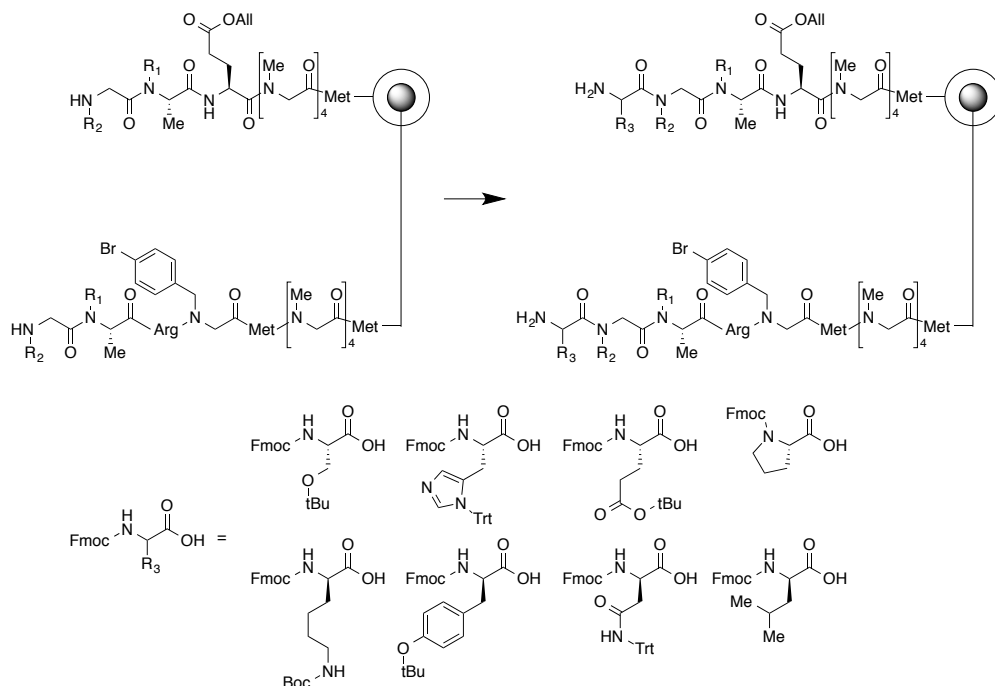

Resin was divided into 8 reaction vessels (150 mg, 30  $\mu$ mol each). Fmoc-amino acid (180  $\mu$ mol), 25.6 mg of Oxyma (180  $\mu$ mol), and 28.0  $\mu$ L of DIC (180  $\mu$ mol) were preincubated in 900  $\mu$ L of DMF at RT for 10 min and applied to resin. Resin was incubated with continuous shaking at RT for 2 h and washed with DMF three

times. These amino acid coupling procedures were repeated once more and resin was combined in one reaction vessel. Fmoc was deprotected and beads were thoroughly mixed.

#### Step 10 BPA coupling

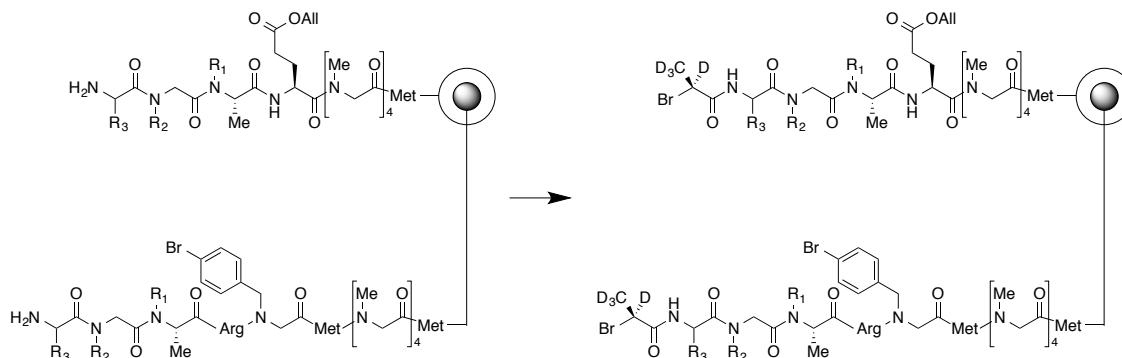

Beads were divided into two reaction vessels (600 mg, 120  $\mu$ mol each). One was acylated with (R)-BPA and the other was acylated with (S)-BPA- $d_4$  following the same procedures of step 5. A structure of oligomer coupled with (S)-BPA- $d_4$  is shown as a representative structure above and hereafter. Beads were combined in one reaction vessel and mixed thoroughly.

#### Step 11 Amine displacement reaction

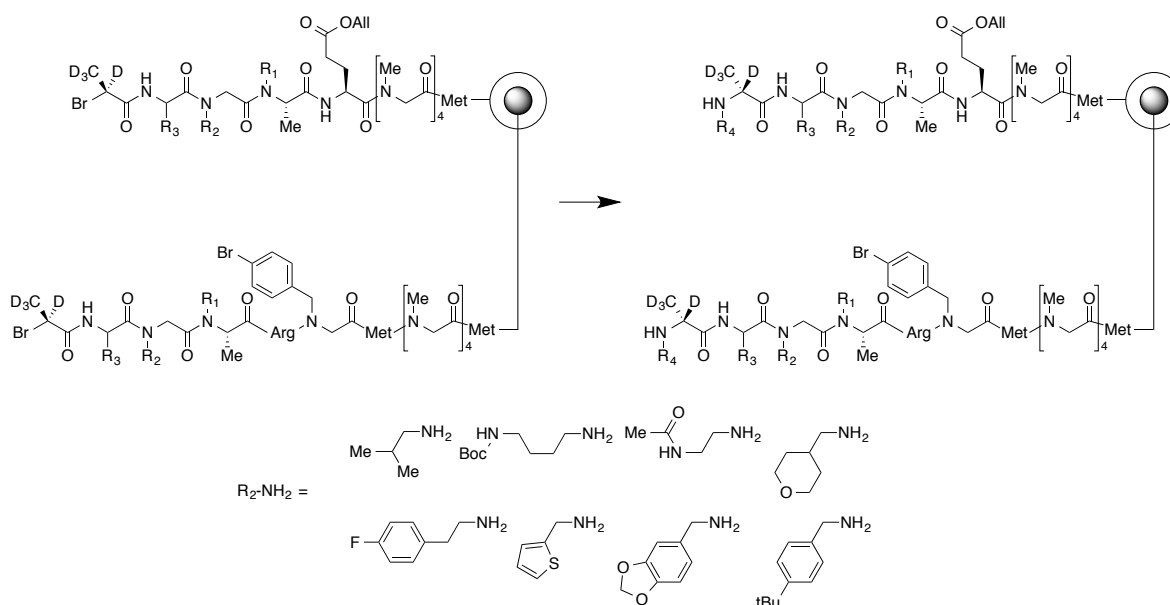

Resin was divided into 8 reaction vessels (150 mg, 30  $\mu$ mol each) and each resin was incubated with 1.2 mL of 1 M solution of one of the 8 primary amines shown above in DMF with continuous shaking at 60  $^{\circ}$ C overnight. Resin was washed with DMF three times, combined into one reaction vessel, and mixed thoroughly.

#### Step 12 Acylation by chloroacetyl chloride

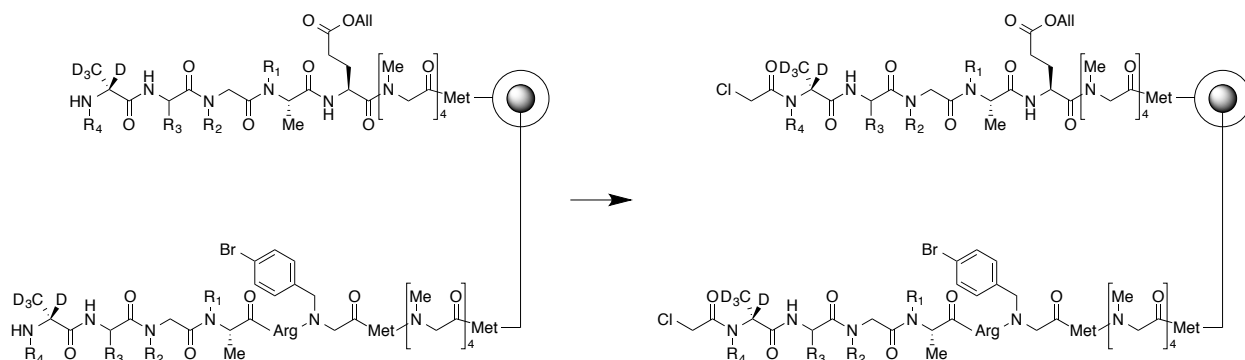

Chloroacetyl chloride reaction was performed following the same procedures of step 7.

### Step 13 Amine displacement reaction

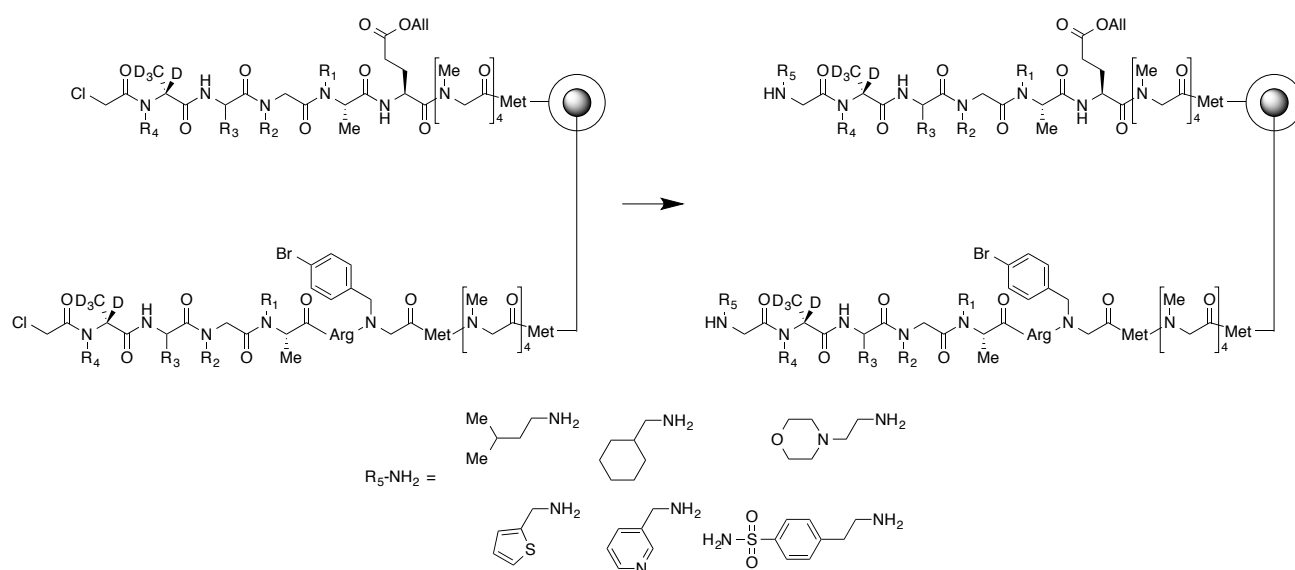

Resin was divided into 6 reaction vessels (200 mg, 40  $\mu$ mol each) and each resin was incubated with 1.6 mL of 1 M solution of one of the 6 primary amines shown above in DMF with continuous shaking at 60  $^{\circ}$ C overnight. Resin was washed with DMF three times, combined into one reaction vessel, and mixed thoroughly.

### Step 14 Deprotection of allyl group on glutamic acid side chain

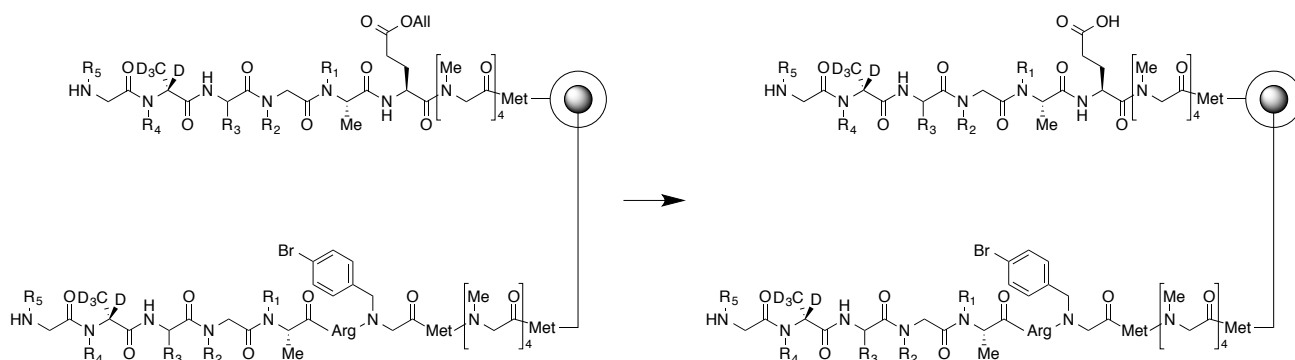

Allyl group was deprotected by incubating resin with 832 mg of  $\text{Pd}(\text{PPh}_3)_4$  (720  $\mu\text{mol}$ ) and 353  $\mu\text{L}$  of  $\text{PhSiH}_3$  (2.88 mmol) in 25 mL DCM with continuous shaking at RT for 1 h. Resin was washed with DCM, DMF, 0.5% DIPEA in DMF, and 0.5% sodium diethyldithiocarbamate trihydrate in DMF three times each and then with 0.5% DIPEA in DMF and DMF once each.

#### Step 15 Macrocyclization and deprotection

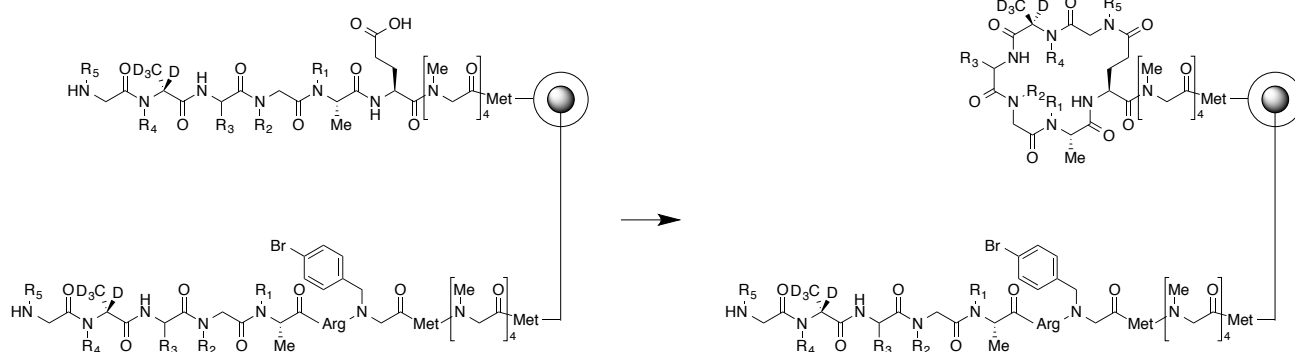

Macrocyclization was performed by incubating resin with 250 mg of PyAOP (480  $\mu\text{mol}$ ), 65.3 mg of HOAt (480  $\mu\text{mol}$ ), and 167  $\mu\text{L}$  of DIPEA (960  $\mu\text{mol}$ ) in 24 mL of DMF with rotation at RT overnight. Resin was washed with DMF and DCM three times each. Small aliquot of the beads were incubated with 1 mL of 50% TFA/DCM containing 2.5% TIPS and 2.5% thioanisole with continuous shaking at RT for 2 h to deprotect all the side chains, washed with DCM three times, and then used for single bead cleavage.

#### Step 16 Single bead cleavage and MALDI-TOF MS analysis of the synthesized linear and macrocyclic oligomers

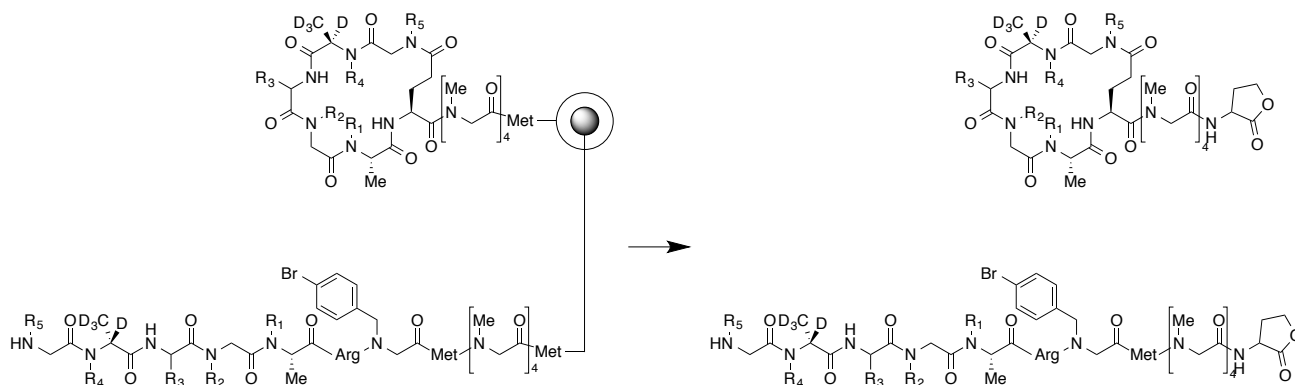

48 beads were separated into microwells of a 96-well plate as one bead per well and oligomers on the beads were cleaved by incubating each bead with 50  $\mu\text{L}$  of 30 mg/mL CNBr in acetonitrile/acetic acid/water = 5/4/1 with gentle shaking at RT overnight. The solution was dried under vacuum and the cleaved oligomers were dissolved in 20  $\mu\text{L}$  of 80% acetonitrile/water containing 0.1% TFA. 0.5  $\mu\text{L}$  of each oligomer solution was spotted on MALDI plate, mixed with 0.5  $\mu\text{L}$  of 5 mg/mL CHCA in 80% acetonitrile/water containing 0.1% TFA, dried, and analyzed by MALDI-TOF MS.

## References

- 1 Gao, Y.; Kodadek, T. *Chem. Biol.* **2013**, *20*, 360.
